# Supplementary material for: Genetic Diversity Analysis of Coxsackievirus A8 Circulating in China and Worldwide Reveals a Highly Divergent Genotype
Source: PubMed Central journal article supplement (PMC7598191; doi:10.3390/v12101061), 2020-09-23
Supplement: viruses-12-01061-s001.pdf [file viruses-12-01061-s001.pdf]

## Supplementary materials

**Supplementary Table 1.** Primers for CV-A8 sequencing designed in this study

| Primer name and position | Sequence (5'-3')           | Orientation |
|--------------------------|----------------------------|-------------|
| CA8-548-A                | AACACGGACACCCAAAGTAGTC     | Reverse     |
| CA8-446-S                | TAGTAGTCCTCCGGCCCCTGAA     | Forward     |
| CA8-1369-A               | TTTTGCAGTGTGGGCTTGGG       | Reverse     |
| CA8-1150-S               | ATGTCTACGCAAATGTGGCAGGA    | Forward     |
| CA8-2353-A               | GCAGCTCCCAATGCTATTAT       | Reverse     |
| CA8-1882-S               | GTCATAATGTGACTGRGCAAG      | Forward     |
| CA8-2862-A               | ATCACCTGGGAGTTGTG          | Reverse     |
| CA8-2707-S               | GGGGTGATCAATGTGCAAGA       | Forward     |
| CA8-3752-A               | TTGCTCCATCGCCTCCTCAT       | Reverse     |
| CA8-3943-S               | TGCCAAACTGGAGTGTA          | Forward     |
| CA8-4945-A               | ACCTTRGATTTCTGTCTCT        | Reverse     |
| CA8-4663-S               | TTCATYCCTCCAATGGCTTC       | Forward     |
| CA8-5710-A               | CCTACYGGCACAAACATTGA       | Reverse     |
| CA8-5344-S               | CTCAAGAAACCTGTTCTCCGCAC    | Forward     |
| CA8-6458-A               | GAGTCATTCAAGCTGCTAGCTT     | Reverse     |
| CA8-6207-S               | TCAGATGAGCATGGAGGAGG       | Forward     |
| CA8-7096-A               | TCCTTCATTGGCATRTRGGGTG     | Reverse     |
| CA8-6759-S               | CAACAAAACCTATTGCGTRCTTGGTG | Forward     |

**Supplementary Table 2.** Information on 171 CV-A8 partial *VPI* sequences. Chinese isolates were shaded.

| Genbank ID | Isolated Country | Isolated year | Genotype     |
|------------|------------------|---------------|--------------|
| AF081229   | USA              | 1949          | A(prototype) |
| AB268280   | CHN              | 2000          | D            |
| AB167803   | JPN              | 2002          | Ungenotyped  |
| AB167804   | JPN              | 2002          | Ungenotyped  |
| KC879489   | ARM              | 2004          | B            |
| KF412905   | IND              | 2004          | B            |
| KC879490   | RUS              | 2004          | B            |
| AB727979   | CHN              | 2005          | D            |
| KC879494   | RUS              | 2005          | B            |
| JQ968946   | CHN              | 2006          | D            |
| KF412944   | IND              | 2006          | B            |
| JX538081   | BAN              | 2007          | Ungenotyped  |
| JN169010   | CHN              | 2007          | D            |
| JN203522   | IND              | 2007          | B            |
| JN203523   | IND              | 2007          | B            |
| KC879502   | TKM              | 2007          | C            |
| HQ844645   | CHN              | 2008          | D            |
| JN169011   | CHN              | 2008          | D            |
| JN203524   | IND              | 2008          | B            |

|          |     |      |             |
|----------|-----|------|-------------|
| KJ472834 | KEN | 2008 | Ungenotyped |
| JQ744287 | PHL | 2009 | Ungenotyped |
| JQ744288 | PHL | 2009 | Ungenotyped |
| JX088583 | CHN | 2011 | D           |
| KY885639 | CHN | 2011 | D           |
| MK111159 | CYP | 2011 | E           |
| MK111160 | CYP | 2011 | E           |
| KC893485 | NL  | 2011 | E           |
| AB759896 | CHN | 2012 | D           |
| AB759897 | CHN | 2012 | D           |
| KC867069 | CHN | 2012 | D           |
| KC867070 | CHN | 2012 | D           |
| KC867071 | CHN | 2012 | D           |
| KC867072 | CHN | 2012 | D           |
| KC867073 | CHN | 2012 | D           |
| KM609475 | CHN | 2012 | D           |
| KM609476 | CHN | 2012 | D           |
| KM609477 | CHN | 2012 | D           |
| KM609478 | CHN | 2012 | D           |
| KM609479 | CHN | 2012 | D           |
| KY885640 | CHN | 2012 | D           |
| KY885641 | CHN | 2012 | D           |
| MK111161 | CYP | 2012 | E           |
| MK111162 | CYP | 2012 | E           |
| KF383362 | THA | 2012 | E           |
| KF383363 | THA | 2012 | E           |
| KF383364 | THA | 2012 | B           |
| KF383365 | THA | 2012 | B           |
| KF383366 | THA | 2012 | B           |
| KF383367 | THA | 2012 | B           |
| KF661169 | THA | 2012 | B           |
| KF661170 | THA | 2012 | B           |
| KF661171 | THA | 2012 | B           |
| KF661172 | THA | 2012 | B           |
| KF661173 | THA | 2012 | B           |
| KF661174 | THA | 2012 | B           |
| KF661175 | THA | 2012 | B           |
| KF661176 | THA | 2012 | B           |
| KF661177 | THA | 2012 | B           |
| KF661178 | THA | 2012 | B           |
| KF661179 | THA | 2012 | Ungenotyped |
| KF661180 | THA | 2012 | B           |
| KF661181 | THA | 2012 | B           |
| KF661182 | THA | 2012 | B           |
| KF661183 | THA | 2012 | B           |
| KF661184 | THA | 2012 | B           |
| KF661185 | THA | 2012 | B           |
| KF661186 | THA | 2012 | B           |
| KF661187 | THA | 2012 | B           |
| KF661188 | THA | 2012 | B           |
| KF661189 | THA | 2012 | B           |
| KF661190 | THA | 2012 | B           |

|          |     |                    |   |
|----------|-----|--------------------|---|
| KF661191 | THA | 2012               | B |
| KF661192 | THA | 2012               | B |
| KF661193 | THA | 2012               | B |
| KF661194 | THA | 2012               | B |
| KF661196 | THA | 2012               | B |
| KF661197 | THA | 2012               | B |
| KF661198 | THA | 2012               | B |
| KF661199 | THA | 2012               | B |
| KF661200 | THA | 2012               | B |
| KF661201 | THA | 2012               | B |
| KF661202 | THA | 2012               | B |
| KF661203 | THA | 2012               | B |
| KF661204 | THA | 2012               | B |
| KF661205 | THA | 2012               | B |
| KF661206 | THA | 2012               | B |
| KF661207 | THA | 2012               | B |
| GS13-467 | CHN | 2013               | D |
| KF780574 | CHN | 2013               | D |
| KF780575 | CHN | 2013               | D |
| KF780576 | CHN | 2013               | D |
| KF780577 | CHN | 2013               | D |
| KM609480 | CHN | 2013               | D |
| KM609481 | CHN | 2013               | D |
| KP289435 | CHN | 2013               | D |
| KY913294 | CHN | 2013               | D |
| KY913295 | CHN | 2013               | D |
| AB848735 | JPN | 2013               | E |
| AB908260 | JPN | 2013               | E |
| LC124146 | JPN | 2013               | E |
| KY865769 | NL  | 2013               | E |
| MK307023 | CHN | Oct.2013-Sep.2016* | E |
| MK307024 | CHN | Oct.2013-Sep.2016  | E |
| MK307025 | CHN | Oct.2013-Sep.2016  | E |
| MK307026 | CHN | Oct.2013-Sep.2016  | E |
| MK307027 | CHN | Oct.2013-Sep.2016  | E |
| MK307028 | CHN | Oct.2013-Sep.2016  | E |
| MK307029 | CHN | Oct.2013-Sep.2016  | E |
| MK307030 | CHN | Oct.2013-Sep.2016  | E |
| MK307031 | CHN | Oct.2013-Sep.2016  | E |
| MK307032 | CHN | Oct.2013-Sep.2016  | E |
| MK307033 | CHN | Oct.2013-Sep.2016  | E |
| MK307034 | CHN | Oct.2013-Sep.2016  | E |
| MK307035 | CHN | Oct.2013-Sep.2016  | E |
| MK307036 | CHN | Oct.2013-Sep.2016  | E |
| MK307037 | CHN | Oct.2013-Sep.2016  | E |
| MK307038 | CHN | Oct.2013-Sep.2016  | E |
| MK307039 | CHN | Oct.2013-Sep.2016  | E |
| MK307040 | CHN | Oct.2013-Sep.2016  | E |
| MK307041 | CHN | Oct.2013-Sep.2016  | E |
| MK307042 | CHN | Oct.2013-Sep.2016  | E |
| MK307043 | CHN | Oct.2013-Sep.2016  | E |
| MK307044 | CHN | Oct.2013-Sep.2016  | E |

|            |     |                   |             |
|------------|-----|-------------------|-------------|
| MK307045   | CHN | Oct.2013-Sep.2016 | E           |
| MK307046   | CHN | Oct.2013-Sep.2016 | E           |
| MK307047   | CHN | Oct.2013-Sep.2016 | E           |
| MK307048   | CHN | Oct.2013-Sep.2016 | E           |
| MK307049   | CHN | Oct.2013-Sep.2016 | E           |
| MK307050   | CHN | Oct.2013-Sep.2016 | E           |
| MK307051   | CHN | Oct.2013-Sep.2016 | E           |
| MK307052   | CHN | Oct.2013-Sep.2016 | E           |
| MK307053   | CHN | Oct.2013-Sep.2016 | E           |
| MK307054   | CHN | Oct.2013-Sep.2016 | E           |
| MK307055   | CHN | Oct.2013-Sep.2016 | E           |
| MK307056   | CHN | Oct.2013-Sep.2016 | E           |
| MK307057   | CHN | Oct.2013-Sep.2016 | E           |
| MK307058   | CHN | Oct.2013-Sep.2016 | E           |
| MK307059   | CHN | Oct.2013-Sep.2016 | E           |
| MK307060   | CHN | Oct.2013-Sep.2016 | E           |
| GS14-481   | CHN | 2014              | E           |
| GS14-943   | CHN | 2014              | E           |
| KP765687   | CHN | 2014              | E           |
| KY885642   | CHN | 2014              | D           |
| KY866545   | NL  | 2014              | E           |
| MK086333   | FRA | 2014-2015**       | Ungenotyped |
| MK086334   | FRA | 2014-2015         | Ungenotyped |
| MK086335   | FRA | 2014-2015         | Ungenotyped |
| MK086336   | FRA | 2014-2015         | Ungenotyped |
| CQ15-Y-120 | CHN | 2015              | E           |
| KY885643   | CHN | 2015              | E           |
| KY913296   | CHN | 2015              | E           |
| KY913297   | CHN | 2015              | E           |
| LC120907   | CHN | 2015              | E           |
| SDHZ040    | CHN | 2015              | D           |
| MK086258   | FRA | 2015              | E           |
| MK561377   | FRA | 2015              | E           |
| KY861076   | SA  | 2015              | E           |
| KY861077   | SA  | 2015              | E           |
| KY861078   | SA  | 2015              | E           |
| TJ16-0148  | CHN | 2016              | C           |
| MH111056   | AUS | 2017              | E           |
| MH111057   | AUS | 2017              | E           |
| SAX17-77   | CHN | 2017              | E           |
| MG844064   | THA | 2017              | E           |
| MG844065   | THA | 2017              | E           |
| MG844066   | THA | 2017              | E           |
| MG844067   | THA | 2017              | E           |
| MG844068   | THA | 2017              | E           |
| HEN18-96   | CHN | 2018              | E           |
| MN058705   | IR  | 2018              | Ungenotyped |
| MK836137   | USA | 2018              | Ungenotyped |

\*no specific isolated year information for these Chinese strains

\*\*no specific isolated year information for these French strains

## Supplementary Figures and legends

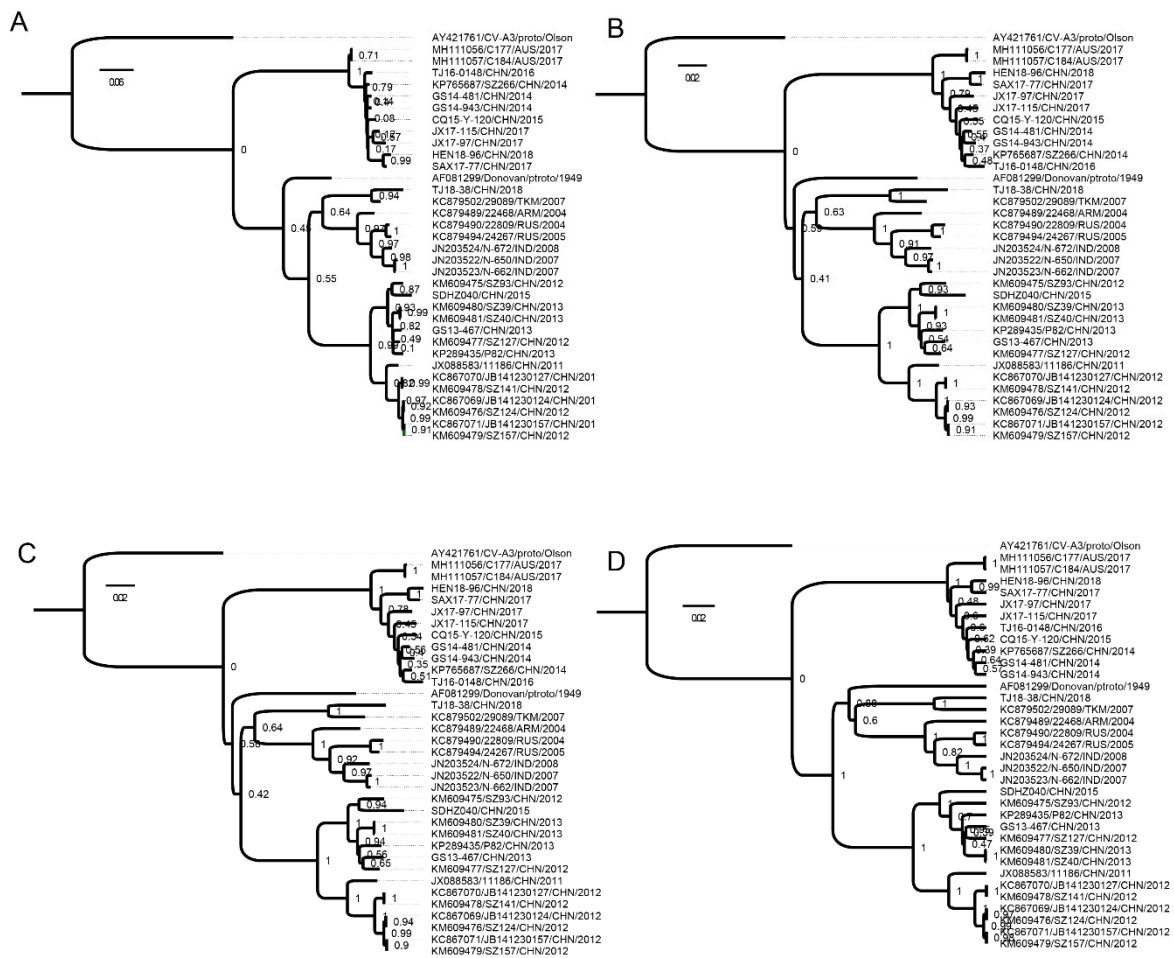

**Supplementary Figure 1.** (A) The maximum likelihood phylogenetic tree, (B) neighbor-joining tree, (C) minimum evolution tree and (D) UPGMA tree of CV-A8 strains constructed based on 34 complete *VPI* sequences, the CV-A3 prototype strain (AY421761) was used as an outgroup, support was estimated with 1,000 bootstrap replicates.
